# Supplementary material for: Effects on the Caco-2 Cells of a Hypoglycemic Protein from Lupin Seeds in a Solution and Adsorbed on Polystyrene Nanoparticles to Mimic a Complex Food Matrix
Source: PubMed Central journal article supplement (PMC6843813; doi:10.3390/biom9100606), 2019-10-14
Supplement: biomolecules-09-00606-s001.pdf [file biomolecules-09-00606-s001.pdf]

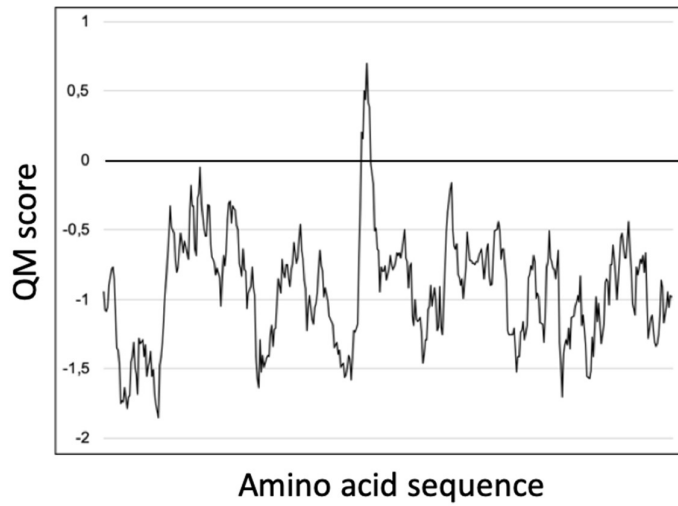

**Supplementary Figure S1:** Prediction of peptides toxicity calculated by using the ToxinPred method [31], available on-line at <http://crdd.osdd.net/raghava/toxinpred/>, using Uniprot KB:Q9FSH9 amino acid sequence of  $\gamma$ C as template.

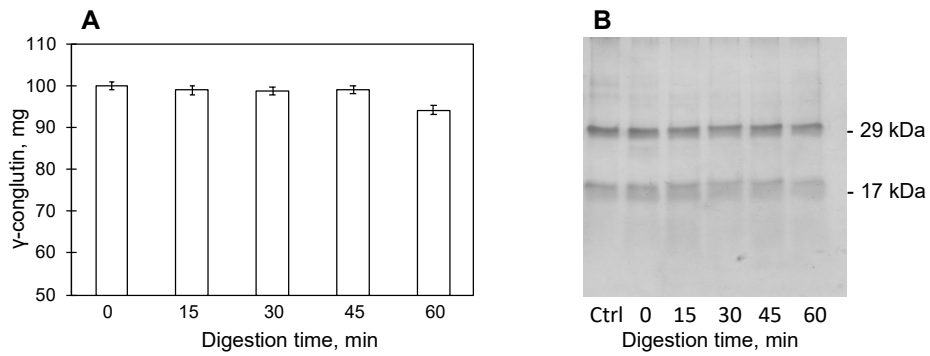

**Supplementary Figure S2. Panel A:** native  $\gamma$ C incubated with trypsin for different times. **Panel B:** Incubation with trypsin effects on  $\gamma$ C adsorbed to NPs. Ctrl stands for native  $\gamma$ C incubated with trypsin after 60 min.
